# Supplementary material
Source: publisher figshare collection journal article supplement (https://aacr.figshare.com/articles/dataset/_/23905286)

**Supplemental Figure 3. Hi-C interaction and TAD map of G7 region.** The chromatin confirmation of the G7 region across the 3 HMCLs (U266, RPMI8226, and KMS11) and PC for comparison. The local TAD structure around the *ABL2* locus appears conserved across the samples suggesting the additional gene dosage as a result of the CNV gain is likely the cause of the overexpression.

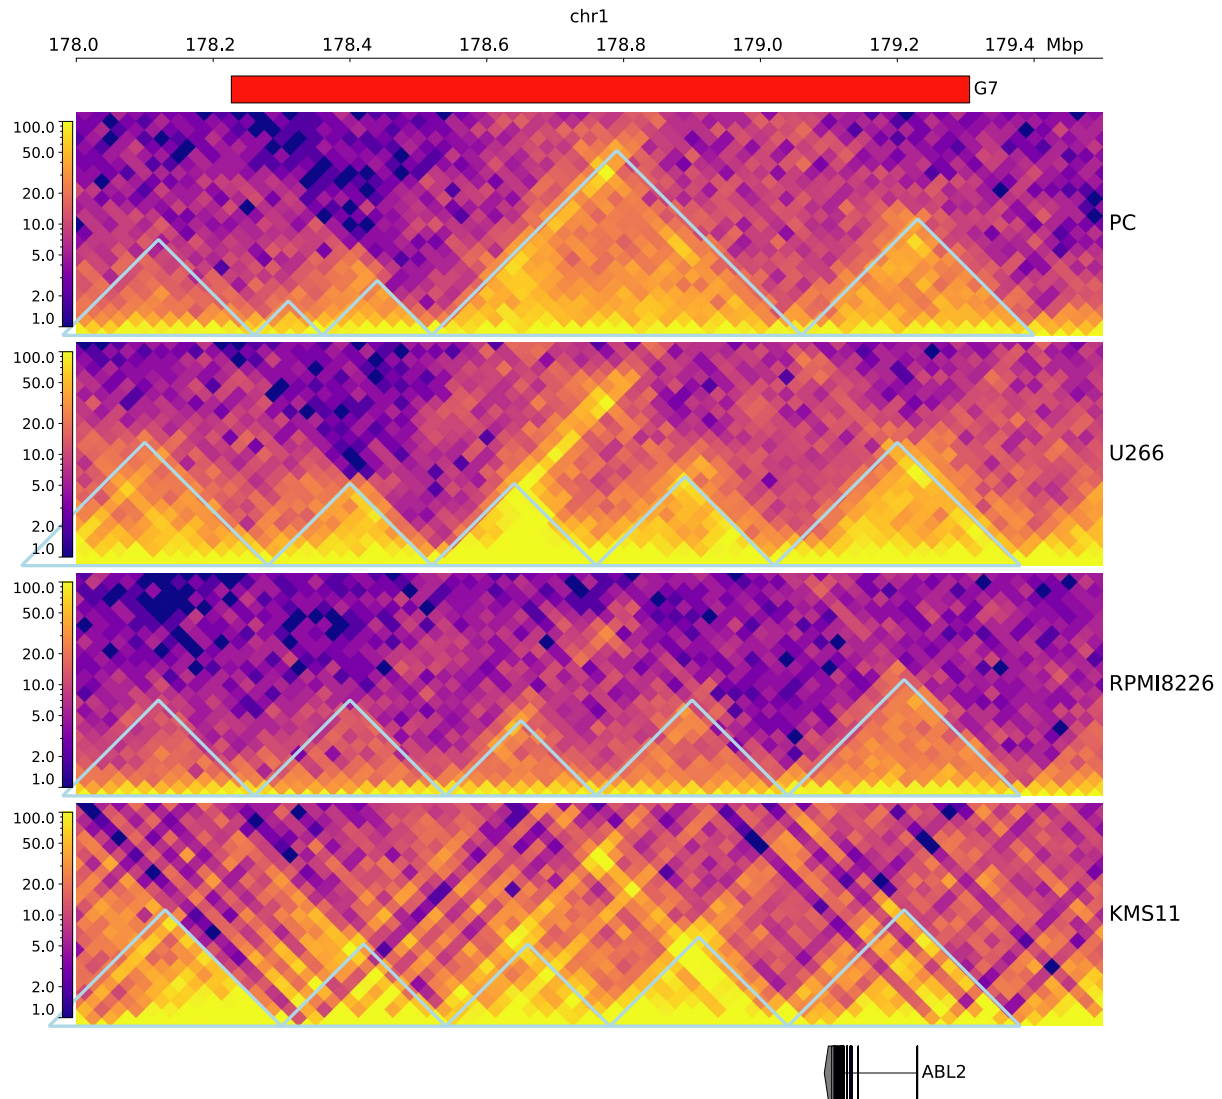

Supplement: Supplementary file 1 [file 41911469]
